# Supplementary material for: Synthesis of pyrazole derivatives and their spectroscopic properties investigated using both experimental and theoretical approaches
Source: Royal Society of Chemistry journal article supplement (doi:10.1039/c4nj00536h), 2014-06-10
Supplement: c4nj00536h1.pdf [file c4nj00536h1.pdf]

### Supplementary material

Synthesis of pyrazole derivatives and their spectroscopic properties using both experimental and theoretical approaches

Adebayo A. Adeniyi and Peter A. Ajibade

Table S1: The four Ramsey terms of the N-N bonds in the ligands

|                       | <i>FC</i> | <b>pz</b>     |            |            | <i>J</i> |
|-----------------------|-----------|---------------|------------|------------|----------|
|                       |           | <i>SD</i>     | <i>PSO</i> | <i>DSO</i> |          |
| *N1-N3                | -5.220    | -0.018        | -1.197     | 0.022      | -6.414   |
|                       |           | <b>bpzm</b>   |            |            |          |
| N6-*N8                | -5.492    | -0.010        | -1.215     | 0.029      | -6.688   |
| N9-*N10               | -5.265    | -0.017        | -1.222     | 0.028      | -6.476   |
| <b>*N8-*N10</b>       | 0.018     | 0.000         | 0.000      | 0.000      | 0.018    |
|                       |           | <b>bpza</b>   |            |            |          |
| *N5-N9                | -5.753    | -0.023        | -1.162     | 0.030      | -6.908   |
| *N6-N10               | -5.753    | -0.023        | -1.162     | 0.030      | -6.908   |
| *N5-*N6               | 0.032     | 0.000         | 0.001      | 0.003      | 0.035    |
|                       |           | <b>bpzpya</b> |            |            |          |
| N10-*N14              | -5.793    | 0.005         | -1.150     | 0.030      | -6.908   |
| N12-*N15              | -5.776    | 0.009         | -1.129     | 0.030      | -6.867   |
| <b>*N14-*N15</b>      | 0.009     | 0.001         | -0.002     | 0.004      | 0.011    |
| N <sub>py</sub> -*N14 | 0.541     | 0.003         | 0.014      | 0.008      | 0.566    |
| N <sub>py</sub> -*N15 | 0.607     | 0.010         | 0.015      | 0.009      | 0.641    |

Table S2: The \*N-N bond and H-bond properties of the ligands

| Bonds      | GBL_I<br>(au) | BPL -<br>GBL_I | $\rho(r)$ | <b>pz</b>          |            |            | <i>V</i> | <i>G</i> | $\nabla^2 V_{en}$ | <i>V/G</i> |
|------------|---------------|----------------|-----------|--------------------|------------|------------|----------|----------|-------------------|------------|
|            |               |                |           | $\nabla^2 \rho(r)$ | $\epsilon$ | $\epsilon$ |          |          |                   |            |
| *N1 - N3   | 2.560         | 1.06E-03       | 0.364     | -0.680             | 0.131      | -0.569     | 0.200    | 11.646   | 2.852             |            |
|            |               |                |           | <b>bpzm</b>        |            |            |          |          |                   |            |
| N6 - *N8   | 2.569         | 7.63E-04       | 0.361     | -0.659             | 0.130      | -0.562     | 0.199    | 15.718   | 2.830             |            |
| N9 - *N10  | 2.566         | 7.17E-04       | 0.362     | -0.661             | 0.135      | -0.566     | 0.200    | 15.541   | 2.826             |            |
|            |               |                |           | <b>bpza</b>        |            |            |          |          |                   |            |
| *N5 - N9   | 2.578         | 5.87E-04       | 0.356     | -0.640             | 0.129      | -0.553     | 0.196    | 17.204   | 2.816             |            |
| *N6 - N10  | 2.578         | 5.87E-04       | 0.356     | -0.640             | 0.129      | -0.553     | 0.196    | 17.204   | 2.816             |            |
| #O12...H19 | 4.890         | 0.2281         | 0.009     | 0.035              | 0.756      | -0.006     | 0.007    | -0.693   | 0.810             |            |
| #O12...H20 | 4.890         | 0.2280         | 0.009     | 0.035              | 0.755      | -0.006     | 0.007    | -0.693   | 0.810             |            |
|            |               |                |           | <b>bpzpya</b>      |            |            |          |          |                   |            |
| N10 - *N14 | 2.580         | 8.35E-04       | 0.355     | -0.635             | 0.112      | -0.550     | 0.196    | 18.235   | 2.811             |            |
| N12 - *N15 | 2.583         | 8.26E-04       | 0.354     | -0.633             | 0.108      | -0.548     | 0.195    | 18.161   | 2.812             |            |

The bonds with “#” represent the H-bonds while an atom with “\*” represent the nitrogen atom on pyrazole that is available

for metal coordination.

Table S3: The QTAIM and NBO properties of the nitrogen atoms that are available (\*N) and not available (N) for metal coordination.

| Atom  | q(A)   | $ \mu_{\text{intra}}(\text{A}) $ | $ \mu_{\text{bond}}(\text{A}) $ | $ \mu(\text{A}) $ | Vol(A),0.00 | $\chi_{\text{Intra\_Is}}(\text{A})$ | $\chi_{\text{bond\_Is}}(\text{A})$ | $\chi_{\text{Iso}}(\text{A})$ | $\chi_{\text{zz}}(\text{A})$ | $\sigma_{\text{Iso}}(\text{A})$ | $\sigma_{\text{Iso}}(\text{A}')$ | $\sigma_{\text{Iso}}(\text{A})$ | Anisotropy | Occ     | Energy  |
|-------|--------|----------------------------------|---------------------------------|-------------------|-------------|-------------------------------------|------------------------------------|-------------------------------|------------------------------|---------------------------------|----------------------------------|---------------------------------|------------|---------|---------|
| pz    |        |                                  |                                 |                   |             |                                     |                                    |                               |                              |                                 |                                  |                                 |            |         |         |
| *N1   | -0.68  | 0.78                             | 0.95                            | 1.16              | 119.03      | -3.92                               | -4.44                              | -8.36                         | -15.79                       | -62.54                          | 12.31                            | -50.23                          | 352.31     | 1.94672 | 0.39917 |
| N3    | -0.83  | 0.62                             | 0.79                            | 0.17              | 93.03       | -4.41                               | -5.18                              | -9.60                         | -15.43                       | 47.91                           | 12.98                            | 60.89                           | 126.34     | 1.56142 | 0.26347 |
| Total | 0.00   | 3.61                             | 3.11                            | 2.30              | 629.67      | -20.31                              | -24.21                             | -44.51                        | -74.36                       | 221.44                          | 97.48                            | 318.91                          | 860.52     |         |         |
| bpzm  |        |                                  |                                 |                   |             |                                     |                                    |                               |                              |                                 |                                  |                                 |            |         |         |
| N6    | -0.828 | 0.578                            | 0.814                           | 0.282             | 70.337      | -3.292                              | -5.747                             | -9.038                        | -7.925                       | 29.574                          | 13.470                           | 43.044                          | 136.58     | 1.55382 | 0.27289 |
| *N8   | -0.682 | 0.767                            | 0.974                           | 1.129             | 116.792     | -3.670                              | -4.313                             | -7.983                        | -5.944                       | 71.654                          | 11.792                           | 59.862                          | 336.50     | 1.9466  | 0.40814 |
| N9    | -0.806 | 0.577                            | 0.815                           | 0.287             | 72.037      | -3.231                              | -5.649                             | -8.880                        | 14.030                       | 24.643                          | 13.689                           | 38.332                          | 130.27     | 1.54606 | 0.26187 |
| *N10  | -0.690 | 0.775                            | 0.963                           | 1.155             | 117.064     | -3.801                              | -4.333                             | -8.135                        | 14.038                       | 67.342                          | 12.001                           | 55.342                          | 317.04     | 1.94645 | 0.40211 |
| Total | 0.000  | 7.626                            | 6.632                           | 4.879             | 1293.130    | 39.875                              | 51.939                             | 91.814                        | 106.811                      | 499.094                         | 203.463                          | 702.557                         | 1701.86    |         |         |
| bpza  |        |                                  |                                 |                   |             |                                     |                                    |                               |                              |                                 |                                  |                                 |            |         |         |
| *N5   | -0.687 | 0.765                            | 0.986                           | 1.133             | 116.402     | -3.653                              | -4.274                             | -7.927                        | -5.486                       | 72.499                          | 11.779                           | 60.720                          | 304.82     | 1.94717 | 0.40943 |
| *N6   | -0.687 | 0.765                            | 0.985                           | 1.133             | 116.399     | -3.653                              | -4.275                             | -7.928                        | -5.487                       | 72.498                          | 11.779                           | 60.719                          | 304.82     | 1.94717 | 0.40944 |
| N9    | -0.807 | 0.569                            | 0.779                           | 0.257             | 70.689      | -3.270                              | -5.515                             | -8.785                        | -6.248                       | 24.740                          | 13.415                           | 38.155                          | 125.43     | 1.55934 | 0.27117 |
| N10   | -0.807 | 0.569                            | 0.779                           | 0.257             | 70.606      | -3.269                              | -5.516                             | -8.785                        | -6.249                       | 24.742                          | 13.416                           | 38.158                          | 125.43     | 1.55934 | 0.27117 |
| Total | 0.000  | 9.101                            | 10.499                          | 7.032             | 1529.574    | 51.928                              | 55.395                             | 107.322                       | 79.855                       | 551.850                         | 221.953                          | 773.804                         | 2412.24    |         |         |
| bpzpy |        |                                  |                                 |                   |             |                                     |                                    |                               |                              |                                 |                                  |                                 |            |         |         |

|                  |        |       |       |        |       |        |        |        |       |       |        |       |       |       |    |
|------------------|--------|-------|-------|--------|-------|--------|--------|--------|-------|-------|--------|-------|-------|-------|----|
|                  |        |       |       |        | 109.0 |        |        |        | -     | -     |        |       |       |       |    |
| *N <sub>py</sub> | -1.112 | 0.054 | 0.944 | 0.907  | 16    | -4.083 | -4.337 | -8.420 | 16.47 | -     | 27.66  | 436.1 | 1.896 | 0.355 | 29 |
|                  |        |       |       |        | 73.05 |        |        |        | -     | -     |        |       |       |       |    |
| N10              | -0.840 | 0.572 | 0.738 | 0.166  | 5     | -3.150 | -5.450 | -8.599 | 12.75 | 10.78 | 26.31  | 134.6 | 1.534 | 0.276 | 32 |
|                  |        |       |       |        | 73.51 |        |        |        | -     | -     |        |       |       |       |    |
| N12              | -0.841 | 0.571 | 0.738 | 0.170  | 3     | -3.174 | -5.269 | -8.443 | 13.37 | 10.55 | 26.81  | 131.5 | 1.531 | 0.274 | 16 |
|                  |        |       |       |        | 112.7 |        |        |        | -     | -     |        |       |       |       |    |
| *N14             | -0.653 | 0.766 | 1.003 | 1.062  | 48    | -3.473 | -4.180 | -7.653 | 12.72 | 10.80 | 62.71  | 349.8 | 1.946 | 0.406 | 98 |
|                  |        |       |       |        | 112.4 |        |        |        | -     | -     |        |       |       |       |    |
| *N15             | -0.656 | 0.768 | 1.013 | 1.061  | 15    | -3.510 | -4.096 | -7.606 | 13.65 | 10.66 | 59.74  | 352.4 | 1.946 | 0.404 | 32 |
| Total            | 0.000  | 10.39 | 6     | 12.224 | 8.071 | 531    | 63.17  | 78.12  | 141.2 | 221.2 | 649.80 | 273.1 | 922.9 | 3638. | 08 |

Table S4: The electronic excitation of the ligands showing their triplet and singlet transitions

| Ligand  | State     | Wavelength | <i>f</i> | Transitions                                                    |
|---------|-----------|------------|----------|----------------------------------------------------------------|
| pz      | Triplet-A | 290.64     | 0        | H-1→L+1 (16%); HOMO→L+1 (104%); H-1→L+4 (7%); HOMO→L+9 (2%)    |
|         | Triplet-A | 244.49     | 0        | H-1→L+1 (94%); HOMO→L+1 (15%); HOMO→L+4 (3%);                  |
|         | Triplet-A | 211.04     | 0        | H-2→L+1 (95%); H-2→L+4 (8%); HOMO→LUMO (3%);                   |
|         | Singlet-A | 207.98     | 0.0071   | HOMO→LUMO (99%);                                               |
|         | Singlet-A | 206.79     | 0        | H-1→LUMO (93%);                                                |
|         | Singlet-A | 205.26     | 0.0551   | H-1→L+1 (40%); HOMO→L+1 (29%); HOMO→L+4 (11%); H-1→L+4 (3%)    |
| bpzm    | Triplet-A | 297.73     | 0        | H-2→LUMO (60%); H-2→L+1 (24%); H-1→LUMO (19%); H-3→LUMO (8%)   |
|         | Triplet-A | 296.03     | 0        | H-1→L+1 (12%); HOMO→LUMO (17%); HOMO→L+1 (42%); HOMO→L+2 (22%) |
|         | Triplet-A | 257.18     | 0        | H-1→LUMO (14%); H-1→L+1 (35%); H-1→L+2 (15%); HOMO→L+1 (14%)   |
|         | Singlet-A | 255.04     | 0.0024   | HOMO→LUMO (75%); HOMO→L+1 (8%);                                |
|         | Singlet-A | 214.20     | 0.0592   | H-1→LUMO (90%); H-2→LUMO (3%);                                 |
|         | Singlet-A | 214.03     | 0.0073   | H-2→LUMO (11%); H-1→L+1 (76%);                                 |
| bpzcooh | Triplet-A | 307.69     | 0        | H-1→LUMO (18%); H-1→L+3 (19%); HOMO→L+1 (47%); HOMO→L+2 (10%)  |
|         | Triplet-A | 307.03     | 0        | H-1→L+1 (32%); HOMO→LUMO (28%); HOMO→L+3 (24%); H-3→L+1 (7%)   |
|         | Triplet-A | 265.21     | 0        | H-6→LUMO (14%); H-3→LUMO (40%); H-2→L+1 (20%); H-              |

|        |           |        |                                                             |
|--------|-----------|--------|-------------------------------------------------------------|
|        |           |        | 1→LUMO (19%)                                                |
|        | Singlet-A | 264.41 | 0.001 HOMO→LUMO (93%);                                      |
|        | Singlet-A | 253.16 | 0.0145 H-1→LUMO (87%) H-6→LUMO (3%); H-3→LUMO (4%);         |
|        | Singlet-A | 248.42 | 0.0342 H-2→LUMO (94%);                                      |
| bpzpya | Triplet-A | 406.98 | 0 HOMO→LUMO (104%); H-8→LUMO (2%);                          |
|        | Triplet-A | 386.82 | H-3→LUMO (10%); HOMO→L+1 (82%); H-9→LUMO (7%); H-9→L+1 (3%) |
|        | Triplet-A | 349.08 | H-1→LUMO (40%); H-1→L+1 (32%); H-1→L+2 (15%); H-2→L+1 (4%)  |
|        | Singlet-A | 338.64 | 0.1315 HOMO→LUMO (88%);                                     |
|        | Singlet-A | 334.79 | 0.001 H-1→LUMO (88%);                                       |
|        | Singlet-A | 322.55 | 0.0012 H-2→LUMO (89%); H-3→LUMO (3%); ;                     |

Table S5: The molecular orbital (MO) contribution of the nitrogen atom(s) “\*N” available for metal coordination and nitrogen atom “N” in pz not available for metal coordination.

| pz    |        |     |      |        |
|-------|--------|-----|------|--------|
| MO    | eV     | *N1 | N3   | others |
| L+5   | 1.41   | -39 | 10   | 130    |
| L+4   | 1.18   | -4  | 0    | 106    |
| L+3   | 0.82   | 71  | -86  | 116    |
| L+2   | 0.67   | -18 | 15   | 105    |
| L+1   | -0.02  | 26  | 14   | 60     |
| LUMO  | -0.05  | -54 | -23  | 179    |
| HOMO  | -6.98  | 32  | 1    | 66     |
| H-1   | -7.26  | 7   | 32   | 61     |
| H-2   | -8.18  | 77  | 4    | 19     |
| H-3   | -11.03 | 3   | 2    | 95     |
| H-4   | -11.83 | 7   | 10   | 82     |
| H-5   | -12    | 23  | 45   | 33     |
| H-6   | -12.24 | 13  | 16   | 71     |
| H-7   | -14.97 | 10  | 12   | 77     |
| bpzpm |        |     |      |        |
| MO    | eV     | *N8 | *N10 | others |
| L+5   | 0.69   | 37  | 9    | 55     |
| L+4   | 0.51   | -6  | 1    | 106    |
| L+3   | 0.46   | -4  | -19  | 125    |
| L+2   | 0.07   | -41 | -9   | 152    |
| L+1   | -0.37  | 2   | 6    | 93     |
| LUMO  | -0.54  | 18  | 4    | 78     |
| HOMO  | -7     | 0   | 29   | 71     |
| H-1   | -7.05  | 5   | 6    | 89     |
| H-2   | -7.33  | 28  | 2    | 70     |
| H-3   | -7.5   | 5   | 2    | 93     |
| H-4   | -8.25  | 2   | 73   | 25     |
| H-5   | -8.42  | 73  | 2    | 25     |
| H-6   | -10.89 | 2   | 6    | 92     |
| H-7   | -11.03 | 2   | 3    | 95     |
| bpza  |        |     |      |        |
| MO    | eV     | *N5 | *N6  | others |
| L+5   | 0.47   | -22 | -21  | 145    |

|      |       |     |     |     |
|------|-------|-----|-----|-----|
| L+4  | 0.25  | -23 | -23 | 148 |
| L+3  | 0.15  | 13  | 13  | 75  |
| L+2  | -0.37 | -6  | -6  | 114 |
| L+1  | -0.71 | 8   | 8   | 84  |
| LUMO | -1.45 | 1   | 1   | 99  |
| HOMO | -7.11 | 17  | 16  | 67  |
| H-1  | -7.26 | 12  | 15  | 73  |
| H-2  | -7.27 | 4   | 2   | 95  |
| H-3  | -7.58 | 7   | 7   | 87  |
| H-4  | -8.38 | 37  | 34  | 29  |
| H-5  | -8.48 | 36  | 39  | 25  |
| H-6  | -8.92 | 2   | 2   | 97  |
| H-7  | -9.9  | 0   | 0   | 100 |

bpzpya

| MO   | eV    | *N9 | *N15 | *N14 | others |
|------|-------|-----|------|------|--------|
| L+5  | 0.23  | 2   | 2    | -32  | 129    |
| L+4  | 0.05  | -6  | -48  | 4    | 153    |
| L+3  | -0.83 | 0   | 4    | -3   | 100    |
| L+2  | -0.86 | 4   | 5    | -5   | 97     |
| L+1  | -2.01 | 1   | 3    | 4    | 92     |
| LUMO | -2.66 | 16  | 0    | 0    | 85     |
| HOMO | -6.93 | 0   | 0    | 0    | 100    |
| H-1  | -7.31 | 2   | 28   | 1    | 69     |
| H-2  | -7.39 | 1   | 3    | 29   | 67     |
| H-3  | -7.54 | 11  | 5    | 6    | 77     |
| H-4  | -7.99 | 36  | 26   | 12   | 25     |
| H-5  | -8.37 | 1   | 28   | 47   | 25     |
| H-6  | -8.41 | 3   | 3    | 0    | 94     |
| H-7  | -8.78 | 35  | 19   | 18   | 28     |

Table S6: Correlation of molecular properties (bold italic) of the ligands to the atomic properties of \*N and its bond \*N-N (bold) and \*N...\*N (bold). The most highly correlated values are in bold.

|                             | <sup>15</sup> N-NMR shift | *N...*N J-coupling | Bond-length J | Bond-strain  | ∇ <sup>2</sup> ρ(r) | Γ            | β            | LUMO        | Band-Gap     |              |
|-----------------------------|---------------------------|--------------------|---------------|--------------|---------------------|--------------|--------------|-------------|--------------|--------------|
| *N-NMR shift                | 1.00                      | 0.55               | <b>-0.95</b>  | <b>0.93</b>  | -0.77               | <b>0.94</b>  | <b>0.91</b>  | 0.62        | -0.80        | -0.78        |
| <b>J-coupling</b> (*N...*N) | 0.55                      | 1.00               | -0.55         | 0.64         | 0.04                | 0.64         | 0.19         | <b>1.00</b> | <b>-0.88</b> | <b>-0.91</b> |
| <b>FC</b>                   | <b>-0.93</b>              | -0.61              | <b>1.00</b>   | <b>-1.00</b> | 0.76                | <b>-1.00</b> | -0.77        | -0.68       | <b>0.90</b>  | <b>0.88</b>  |
| <b>SD</b>                   | 0.49                      | <b>0.89</b>        | -0.33         | 0.41         | 0.18                | 0.42         | 0.22         | <b>0.87</b> | -0.66        | -0.70        |
| <b>PSO</b>                  | 0.51                      | 0.71               | -0.72         | 0.79         | -0.33               | 0.78         | 0.19         | 0.74        | <b>-0.87</b> | <b>-0.86</b> |
| <b>DSO</b>                  | <b>0.99</b>               | 0.43               | <b>-0.94</b>  | <b>0.91</b>  | <b>-0.86</b>        | <b>0.92</b>  | <b>0.95</b>  | 0.50        | -0.73        | -0.70        |
| <b>J</b>                    | <b>-0.95</b>              | -0.55              | 1.00          | <b>-0.99</b> | 0.81                | <b>-0.99</b> | -0.81        | -0.62       | <b>0.86</b>  | 0.83         |
| <b>Bond-length</b>          | <b>0.93</b>               | 0.64               | <b>-0.99</b>  | 1.00         | -0.74               | <b>1.00</b>  | 0.75         | 0.70        | <b>-0.92</b> | <b>-0.89</b> |
| <b>Bond-strain</b>          | -0.77                     | 0.04               | 0.81          | -0.74        | 1.00                | -0.74        | <b>-0.88</b> | -0.05       | 0.41         | 0.36         |

|                                     |              |              |              |              |              |              |              |              |              |              |
|-------------------------------------|--------------|--------------|--------------|--------------|--------------|--------------|--------------|--------------|--------------|--------------|
| $\rho(\mathbf{r})$                  | <b>-0.88</b> | -0.66        | <b>0.97</b>  | <b>-0.99</b> | 0.69         | <b>-0.99</b> | -0.67        | -0.72        | <b>0.94</b>  | <b>0.91</b>  |
| $\nabla^2\rho(\mathbf{r})$          | <b>0.94</b>  | 0.64         | <b>-0.99</b> | <b>1.00</b>  | -0.74        | 1.00         | 0.76         | 0.70         | <b>-0.92</b> | <b>-0.89</b> |
| $\epsilon$                          | -0.59        | <b>-1.00</b> | 0.58         | -0.67        | 0.01         | -0.67        | -0.22        | <b>-1.00</b> | <b>0.90</b>  | <b>0.93</b>  |
| $V$                                 | <b>0.90</b>  | 0.69         | <b>-0.98</b> | <b>1.00</b>  | -0.68        | <b>0.99</b>  | 0.69         | 0.75         | <b>-0.95</b> | <b>-0.93</b> |
| $G$                                 | -0.82        | -0.60        | <b>0.96</b>  | <b>-0.97</b> | 0.70         | <b>-0.97</b> | -0.61        | -0.66        | <b>0.90</b>  | <b>0.87</b>  |
| $\nabla^2V_{\text{en}}$             | <b>0.98</b>  | 0.62         | <b>-0.98</b> | <b>0.98</b>  | -0.76        | <b>0.98</b>  | 0.85         | 0.68         | <b>-0.88</b> | <b>-0.86</b> |
| $ V/G $                             | <b>-0.96</b> | -0.63        | <b>0.99</b>  | <b>-0.99</b> | 0.76         | <b>-1.00</b> | -0.80        | -0.69        | <b>0.90</b>  | <b>0.88</b>  |
| $q(A)$                              | 0.38         | <b>0.97</b>  | -0.34        | 0.44         | 0.26         | 0.44         | 0.02         | <b>0.95</b>  | -0.75        | -0.79        |
| $ \mu_{\text{intra}}(A) $           | <b>-0.98</b> | -0.37        | <b>0.94</b>  | <b>-0.89</b> | <b>0.88</b>  | <b>-0.90</b> | <b>-0.97</b> | -0.44        | 0.69         | 0.66         |
| $ \mu_{\text{bond}}(A) $            | <b>0.94</b>  | 0.77         | <b>-0.95</b> | <b>0.97</b>  | -0.61        | <b>0.98</b>  | 0.72         | <b>0.82</b>  | <b>-0.96</b> | <b>-0.95</b> |
| $ \mu(A) $                          | -0.77        | <b>-0.96</b> | 0.72         | -0.78        | 0.21         | -0.78        | -0.47        | <b>-0.97</b> | <b>0.93</b>  | <b>0.95</b>  |
| $\text{Vol}(A)$                     | <b>-0.84</b> | <b>-0.91</b> | 0.82         | <b>-0.87</b> | 0.36         | <b>-0.87</b> | -0.56        | <b>-0.94</b> | <b>0.96</b>  | <b>0.97</b>  |
| $\chi_{\text{Intra\_Iso}}(A)$       | <b>0.96</b>  | 0.77         | <b>-0.91</b> | <b>0.92</b>  | -0.57        | 0.93         | 0.76         | 0.82         | <b>-0.92</b> | <b>-0.91</b> |
| $\chi_{\text{bond\_Iso}}(A)$        | <b>0.95</b>  | 0.78         | <b>-0.93</b> | <b>0.95</b>  | -0.59        | <b>0.96</b>  | 0.73         | 0.83         | <b>-0.95</b> | <b>-0.94</b> |
| $\chi_{\text{Iso}}(A)$              | <b>0.95</b>  | 0.78         | <b>-0.92</b> | <b>0.94</b>  | -0.58        | <b>0.94</b>  | 0.75         | 0.83         | <b>-0.93</b> | <b>-0.92</b> |
| $\chi_{\text{zz}}(A)$               | 0.61         | -0.32        | -0.55        | 0.45         | <b>-0.91</b> | 0.45         | 0.87         | -0.24        | -0.07        | -0.02        |
| $\sigma_{\text{Iso}}(A,A)$          | <b>-1.00</b> | -0.49        | <b>0.94</b>  | <b>-0.92</b> | 0.81         | <b>-0.92</b> | <b>-0.94</b> | -0.56        | 0.76         | 0.74         |
| $\sigma_{\text{Iso}}(A',A)$         | -0.81        | <b>-0.93</b> | 0.77         | -0.83        | 0.29         | -0.83        | -0.52        | <b>-0.96</b> | <b>0.95</b>  | <b>0.96</b>  |
| $\sigma_{\text{Iso}}(A)$            | <b>-1.00</b> | -0.55        | <b>0.95</b>  | <b>-0.93</b> | 0.77         | <b>-0.94</b> | <b>-0.91</b> | -0.62        | 0.80         | 0.78         |
| Anisotropy                          | -0.40        | 0.39         | 0.54         | -0.45        | <b>0.88</b>  | -0.45        | -0.58        | 0.31         | 0.09         | 0.03         |
| Occupation                          | 0.00         | -0.50        | -0.24        | 0.19         | -0.59        | 0.17         | 0.14         | -0.45        | 0.09         | 0.16         |
| Energy                              | <b>-0.92</b> | -0.19        | <b>0.88</b>  | -0.82        | <b>0.94</b>  | -0.82        | <b>-0.98</b> | -0.27        | 0.55         | 0.52         |
| Dipole                              | 0.70         | 0.30         | -0.43        | 0.39         | -0.38        | 0.41         | 0.77         | 0.32         | -0.30        | -0.32        |
| $\Sigma_i \langle \alpha \rangle_i$ |              |              |              |              |              |              |              |              |              |              |
|                                     | <b>0.89</b>  | <b>0.87</b>  | <b>-0.88</b> | <b>0.92</b>  | -0.46        | <b>0.92</b>  | 0.63         | <b>0.91</b>  | <b>-0.97</b> | -0.97        |
| $\Delta\alpha 1$                    | -0.36        | <b>-0.98</b> | 0.37         | -0.48        | -0.23        | -0.48        | 0.03         | <b>-0.96</b> | 0.79         | 0.82         |
| $\Delta\alpha 2$                    | 0.58         | <b>0.99</b>  | -0.52        | 0.60         | 0.04         | 0.61         | 0.24         | <b>0.98</b>  | <b>-0.84</b> | <b>-0.88</b> |
| $\Delta\alpha 3$                    | 0.55         | <b>1.00</b>  | -0.52        | 0.60         | 0.06         | 0.61         | 0.20         | <b>0.99</b>  | <b>-0.86</b> | <b>-0.89</b> |
| $\Gamma$                            | <b>0.91</b>  | 0.19         | -0.81        | 0.75         | -0.88        | 0.76         | <b>1.00</b>  | 0.26         | -0.49        | -0.47        |
| $\beta$                             | 0.62         | <b>1.00</b>  | -0.62        | 0.70         | -0.05        | 0.70         | 0.26         | 1.00         | <b>-0.92</b> | <b>-0.94</b> |
| <i>HOMO</i>                         | -0.10        | 0.62         | 0.26         | -0.17        | 0.70         | -0.16        | -0.33        | 0.56         | -0.18        | -0.25        |
| <i>LUMO</i>                         | -0.80        | <b>-0.88</b> | <b>0.86</b>  | <b>-0.92</b> | 0.41         | <b>-0.92</b> | -0.49        | <b>-0.92</b> | <b>1.00</b>  | <b>1.00</b>  |
| <i>Band-Gap</i>                     | -0.78        | <b>-0.91</b> | <b>0.83</b>  | <b>-0.89</b> | 0.36         | <b>-0.89</b> | -0.47        | <b>-0.94</b> | 1.00         | 1.00         |
| <i>Non-Lewis orbital</i>            | -0.02        | 0.77         | 0.10         | 0.00         | 0.64         | 0.01         | -0.34        | 0.72         | -0.39        | -0.44        |
